# Supplementary material for: Designed Ag-decorated Mn:ZnO nanocomposite: facile synthesis, and enhanced visible light absorption and photogenerated carrier separation
Source: Royal Society of Chemistry journal article supplement (doi:10.1039/d0cp04731g), 2020-01-01
Supplement: d0cp04731g1.pdf [file d0cp04731g1.pdf]

## Electronic Supplementary Information

Designed Ag-decorated Mn:ZnO nanocomposite: Facile synthesis, enhanced visible light absorption and photogenic carrier separation

Jing Li,<sup>a</sup> Huan Yuan<sup>a</sup>, Qiuping Zhang<sup>a</sup>, Kaiyi Luo,<sup>a</sup> Yutong Liu<sup>a</sup>, Wenyu Hu<sup>a</sup>, Ming Xu<sup>a\*</sup>, Shuyan Xu,<sup>b</sup>  
<sup>a</sup> College of Electrical & Information Engineering & Key Lab of Information Materials of Sichuan Province, Southwest University for Nationalities, Chengdu 610041, China.  
 hsuming\_2001@aliyun.com (M. Xu)

<sup>b</sup> Plasma Sources and Application Center/Space Propulsion Centre Singapore, NIE, and Institute of Advanced Studies, Nanyang Technological University, 637616, Singapore.

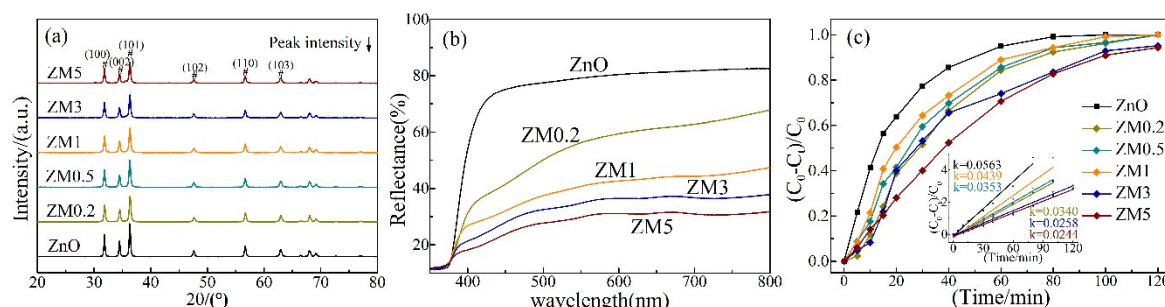

**Figure S1.** (a) XRD patterns of Mn-doped ZnO with different Mn content in the range 20-80°. (b) The UV-vis diffuse reflectance spectrum of as-prepared Mn-doped ZnO with different Mn content. (c) Photodegradation of MB with as-synthesized Mn doped ZnO with different Mn content under simulated sunlight irradiation.

The Mn-doped ZnO NPs with different Mn concentrations were successfully produced by the facile polymer network gel method. Obtained Mn-doped ZnO were characterized by X-Ray diffraction (XRD) to investigate the phases and components of as-prepared series of catalysts, as shown in **Figure S1a** and **Table S2**. With the increase of Mn concentration, the crystal quality of catalyst gradually deteriorate due to the lattice disorder as the diverse ionic radius. The UV-vis diffuse reflection spectrum of as-prepared samples is provided in **Figure S1b**. And the photocatalytic properties of the as-prepared samples were evaluated by the degradation of MB aqueous solutions upon exposure to the simulated sunlight irradiation is shown in **Figure S1c**. The introduction of manganese obviously enhanced the visible absorption of ZnO but does not improve its photocatalytic performance, the highest catalytic activity of Mn-doped

ZnO NPs achieves with the 1mol% Mn concentration, which is similar to Yadollah's report<sup>[S1]</sup>. In addition, it was found in our previous study that Ag-decorated ZnO photocatalyst had the best activity removing organic pollutants such as methylene blue (MB), methyl orange (MO) and rhodamine B (RhB) in aqueous solution when the Ag modification amount was 3 mol%<sup>[S2,28]</sup>. Therefore, the content of Ag deposition used by a facile polymer network gel method this paper kept 3mol%.

**Table S1** The main reagent dosages used in synthetic processes of ZnO, Mn:ZnO, Ag/ZnO and Mn:ZnO/Ag composites

| <b>samples</b>   | <b>Zn(NO<sub>3</sub>)<sub>2</sub>·6H<sub>2</sub>O/g</b> | <b>Mn(NO<sub>3</sub>)<sub>2</sub>·4H<sub>2</sub>O/g</b> | <b>AgNO<sub>3</sub>/g</b> |
|------------------|---------------------------------------------------------|---------------------------------------------------------|---------------------------|
| <b>ZnO</b>       | <b>6.0099</b>                                           | <b>NONE</b>                                             | <b>NONE</b>               |
| <b>Mn:ZnO</b>    | <b>5.9498</b>                                           | <b>0.0512</b>                                           | <b>NONE</b>               |
| <b>Ag/ZnO</b>    | <b>5.8296</b>                                           | <b>NONE</b>                                             | <b>0.1021</b>             |
| <b>Mn:ZnO/Ag</b> | <b>5.7695</b>                                           | <b>0.0512</b>                                           | <b>0.1021</b>             |

Materials and reagents required for this experiment, including Zn(NO<sub>3</sub>)<sub>2</sub>·6H<sub>2</sub>O, , AgNO<sub>3</sub>, Mn(NO<sub>3</sub>)<sub>2</sub>·4H<sub>2</sub>O, glucosum anhydricum, tartaric acid, acrylamide, N, N'-methylene diacrylamide. All reagents were of analytical grade and used without further purification.

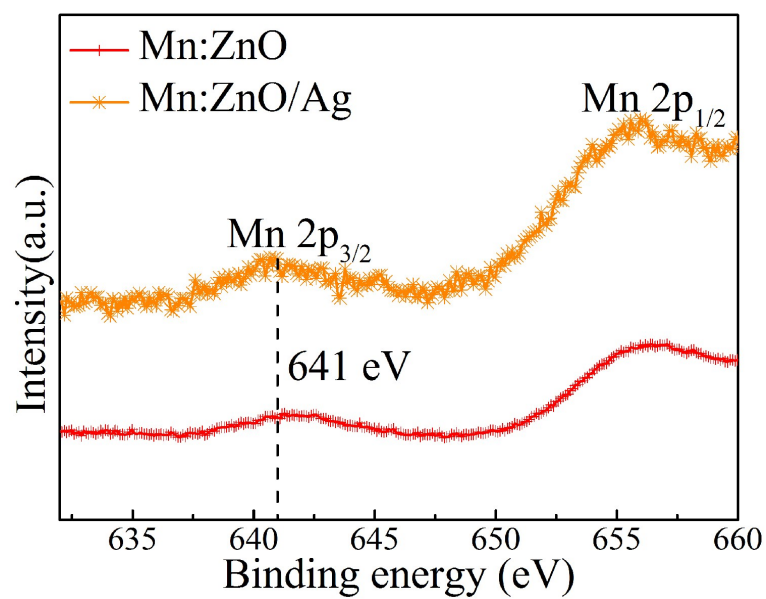

**Figure S2.** The high-resolution Mn 2p XPS spectra.

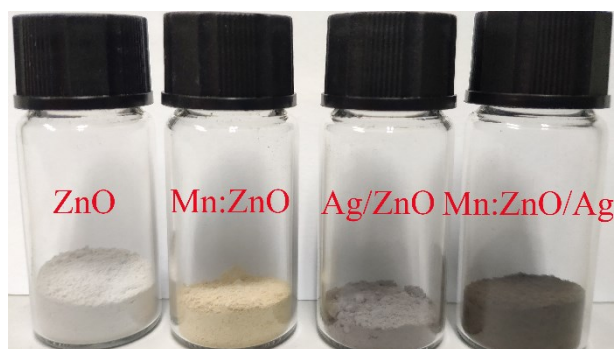

**Figure S3.** The color transformation of as-synthesized samples.

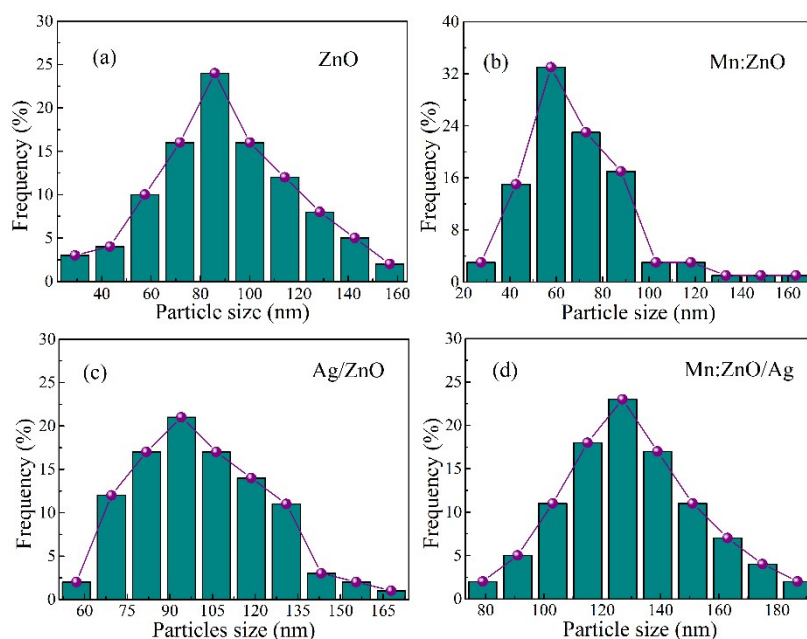

**Figure S4.** Particle size distribution of pure ZnO, Mn:ZnO, Ag/ZnO and Mn:ZnO/Ag NPs.

**Table S2.** Average particle size of pure ZnO, Mn:ZnO, Ag/ZnO and Mn:ZnO/Ag NPs.

| Samples                    | ZnO   | Mn:ZnO | Ag/ZnO | Mn:ZnO/Ag |
|----------------------------|-------|--------|--------|-----------|
| Average particle size (nm) | 90.42 | 69.31  | 101.22 | 129.83    |

## References

- [S1] A Yadollah, A Abdul, Z Zulkarnain, Y Nor, Synthesis and Characterization of Manganese Doped ZnO Nanoparticles, *Int. J. Basic Appl.* 11 (2011) 1361.
- [S2] Y H Lu, Xu M, Xu L X, Enhanced ultraviolet photocatalytic activity of Ag/ZnO nanoparticles synthesized by modified polymer-network gel method, *Journal of Nanoparticle Research.* 17 (2015) 350.
